# Supplementary material for: Identification of an Antimicrobial Peptide from the Venom of the Trinidad Thick-Tailed Scorpion Tityus trinitatis with Potent Activity against ESKAPE Pathogens and Clostridioides difficile
Source: MDPI journal article supplement (doi:10.3390/antibiotics12091404), 2023-09-04
Supplement: s1 [file s1]

## Supplementary Materials

### Purification of the peptides

The pooled scorpion venom samples were diluted with 0.1% (v/v) TFA/water (50 mL) and concentration and partial purification of the peptides was accomplished by passage at a flow rate of approximately 2 mL.min<sup>-1</sup> through two Sep-Pak C-18 cartridges connected in series (Waters Associates, Milford, MA, USA) as previously described [50]. Bound material was eluted with acetonitrile/water/TFA (70.0:29.9:0.1, v/v/v) and freeze-dried. The material was redissolved in 0.1% (v/v) TFA/water (2 mL) and injected onto a semipreparative (1.0 cm x 25 cm) Vydac 218TP510 (C-18) reversed-phase HPLC column (Grace, Deerfield, IL, USA) equilibrated with 0.1% (v/v) TFA/water at a flow rate of 2.0 mL.min<sup>-1</sup>. The concentration of acetonitrile in the eluting solvent was raised to 21% (v/v) over 10 min and to 63% (v/v) over 60 min using linear gradients. Absorbance was monitored at 214 nm and fractions (1 min) were collected using a BioRad 2110 fraction collector. The peptides within the peaks designated 4 – 6 (Figure 1) containing the antimicrobial peptides were subjected to further purification by chromatography on (1.0 cm x 25 cm) Vydac 214TP510 (C-4) column. The concentration of acetonitrile in the eluting solvent was raised from 21% to 56% (v/v) over 50 min. The flow rate was 2.0 mL.min<sup>-1</sup> and fractions were collected by hand. The peaks 1 - 3 containing the ion-channel toxins were purified on the same column. The concentration of acetonitrile in the eluting solvent was raised from 21% to 42% (v/v) over 50 min and the flow rate was 2.0 mL.min<sup>-1</sup>.

### Peptide synthesis

TtAP-1, TtAP-2 and TtAP-3 were supplied in crude form by Synpeptide Co., Ltd. (Shanghai, China). They were purified to near homogeneity (> 98% purity), assessed by symmetrical peak shape and mass spectrometry, by reversed-phase HPLC on a (2.2 cm x 25 cm) Vydac 218TP1022 (C-18) column equilibrated with acetonitrile/water/TFA (35.0/64.9.9.9/0.1, v/v/v) at a flow rate of 6 mL.min<sup>-1</sup>. The concentration of acetonitrile was raised to 63% (v/v) over 60 min using a linear gradient. Absorbance was measured at 214 nm and the major peak in the chromatogram was collected manually. The identities of the peptides were confirmed by electrospray mass spectrometry.

### Proteomic analysis of the purified toxins

The molecular masses of the purified components were determined by nano-Acquity Ultra Performance LC (Waters Corporation, Milford, MA, USA) using a BEH130 C-18 (100 µm x 100 mm, 1.7 µm particle size) column in-line with a Waters SYNAPT G2 High Definition Mass Spectrometry System. The flow rate was set to 0.6 µL.min<sup>-1</sup> and the column was developed with a linear gradient of 0.1% formic acid in water (solution A) and 0.1% formic acid in acetonitrile (solution B), isocratically 1% B for 1 min, followed by 1–12% B for 1 min, 12–40% B for 15 min, 40–85% B for 2 min. Monoisotopic molecular masses were calculated by manual deconvolution of the isotope-resolved multiply charged MS1 mass spectra. The purified toxins were initially analysed by SDS-PAGE on 15% polyacrylamide gels under reducing and non-reducing conditions and the protein bands were excised from Coomassie Brilliant Blue-stained gels and subjected to automated reduction, alkylation, and in-gel digestion with sequencing grade porcine pancreatic trypsin using a Progest<sup>TM</sup> digester (Genomic Solutions, Ann Arbor, MI, USA). Tryptic digests were dried in a SpeedVac vacuum centrifuge, redissolved in 16 µL of 0.1% formic acid in water and submitted to LCMS/MS. Tryptic peptides were separated by nano-Acquity Ultra Performance LC as described above. Doubly and triply charged ions were selected for collision-induced dissociation (CID)-MS/MS. Fragmentation spectra were interpreted (a) manually (de novo sequencing), (b) using the on-line form of the MASCOT Server (version 2.8.1.242) at <http://www.matrixscience.com> against the last update (December 7th, 2022) of the NCBI non-redundant database, and (c) processed in the Waters Corporation's ProteinLynx Global SERVER 2013 version 2.5.2. (with Expression version 2.0). The following search parameters were used: Taxonomy: Metazoa (Animals); Enzyme: trypsin (two missed cleavage allowed); MS/MS mass tolerance was set to ± 0.6 Da; carbamidomethyl cysteine and oxidation of methionine were selected as fixed and variable modifications, respectively. All matched MS/MS data were manually checked. Peptide sequences assigned by de novo MS/MS were matched to homologous proteins available in the NCBI non-redundant protein sequences database using the online BLASTP program at <https://blast.ncbi.nlm.nih.gov/Blast.cgi>.
